# Supplementary material for: A novel “turn on” fluorescence probe based on a caffeic acid skeleton for detecting Al3+ and bioimaging application
Source: Royal Society of Chemistry journal article supplement (doi:10.1039/d3ay00643c), 2023-01-01
Supplement: d3ay00643c1.pdf [file d3ay00643c1.pdf]

**Fig. S1**  $^1\text{H}$  NMR spectrum of compound **HAM** in DMSO.

**Fig. S2**  $^{13}\text{C}$  NMR spectrum of compound **HAM** in DMSO.

**Fig. S3** ESI-HRMS spectrum of compound **HAM**.

**Fig. S4.** Fluorescence responses of **HBA** with  $\text{Al}^{3+}$  in different solvents.

**Fig. S5.** The effect of pH on the fluorescence intensity of **HAM** ( $10\ \mu\text{M}$ ) with in the presence of  $\text{Al}^{3+}$  ( $100\ \mu\text{M}$ ).

**Fig. S6.** Fluorescence response time for **HAM** ( $10\ \mu\text{M}$ ) with the addition of  $\text{Al}^{3+}$  ( $100\ \mu\text{M}$ ) in DMF/PBS (1/1, v/v, pH=7, 10 mM).

**Fig. S7.** Job's plot of probe **HAM** with  $\text{Al}^{3+}$ .

**Fig. S8.** Fluorescence intensity of **HAM** ( $10\ \mu\text{M}$ ) with  $\text{Al}^{3+}$  in the presence of various competitive anions ( $100\ \mu\text{M}$ ). (1.  $\text{CH}_3\text{COO}^-$ , 2.  $\text{I}^-$ , 3.  $\text{H}_2\text{PO}_4^-$ , 4.  $\text{P}_2\text{O}_7^{4-}$ , 5.  $\text{SO}_3^{2-}$ , 6.  $\text{PO}_4^{3-}$ , 7.  $\text{SO}_4^{2-}$ , 8.  $\text{HSO}_3^-$ , 9.  $\text{SO}_4^{2-}$ , 10.  $\text{F}^-$ , 11.  $\text{SCN}^-$ , 12.  $\text{Cl}^-$ , 13.  $\text{Br}^-$ , 14.  $\text{ClO}^-$ , 15.  $\text{HCO}_3^-$ , 16.  $\text{S}^{2-}$ )

**Fig. S9.** MS spectrum of probe **HAM- $\text{Al}^{3+}$** .

**Fig. S10.** MTT assay for the survival rate HeLa cells treated with various concentrations of **probe HAM** (0-100  $\mu\text{M}$ ).

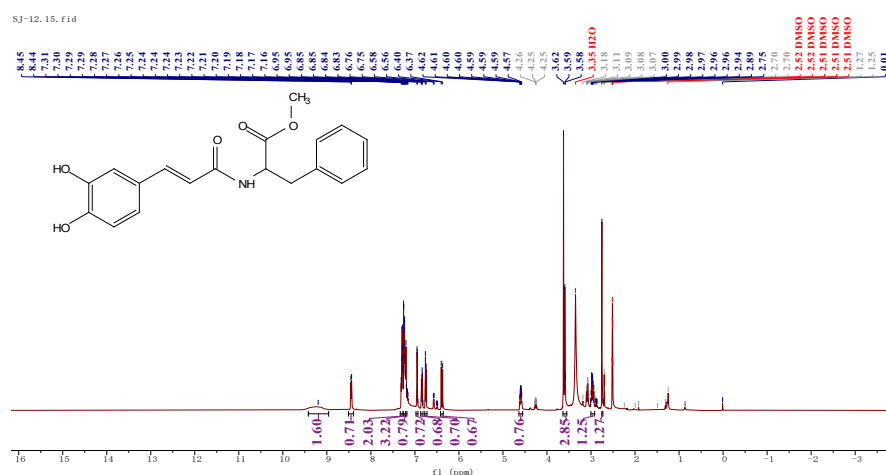

**Fig. S1**

D3-1,2, F1d

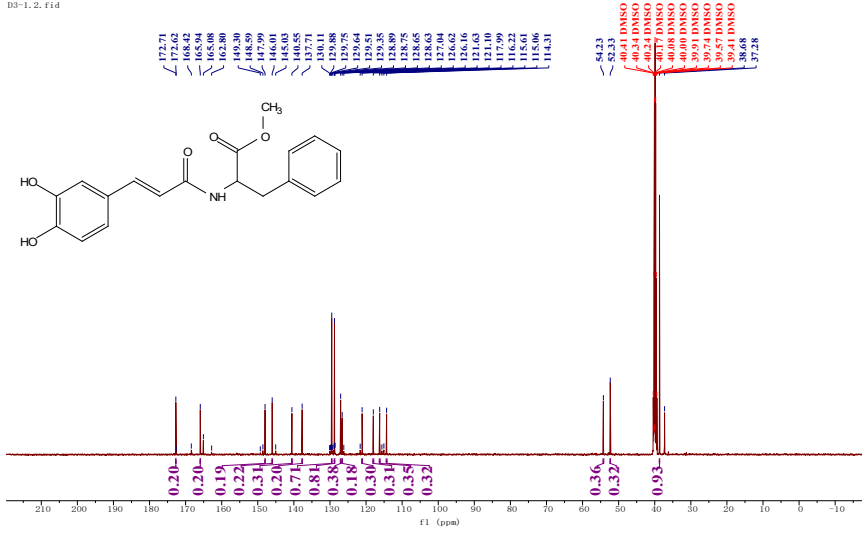

Fig. S2

MS 缩放的质谱图

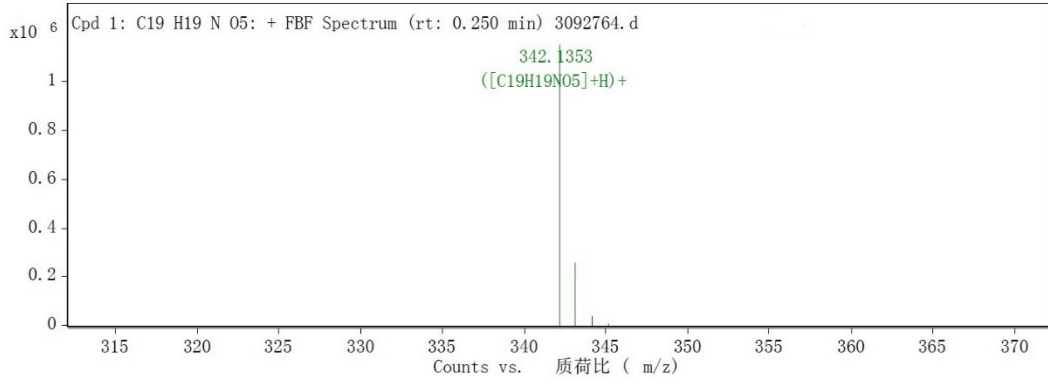

Fig. S3

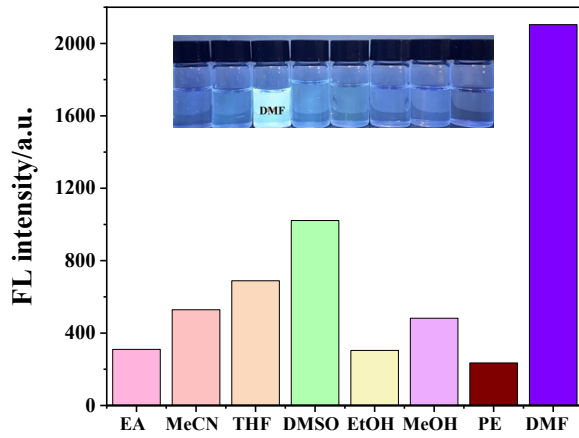

Fig. S4

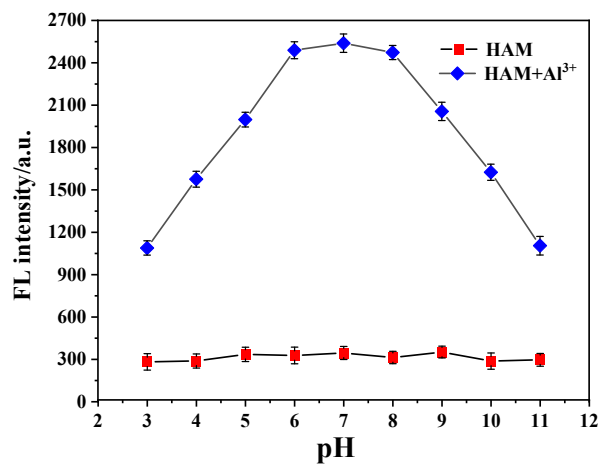

Fig. S5

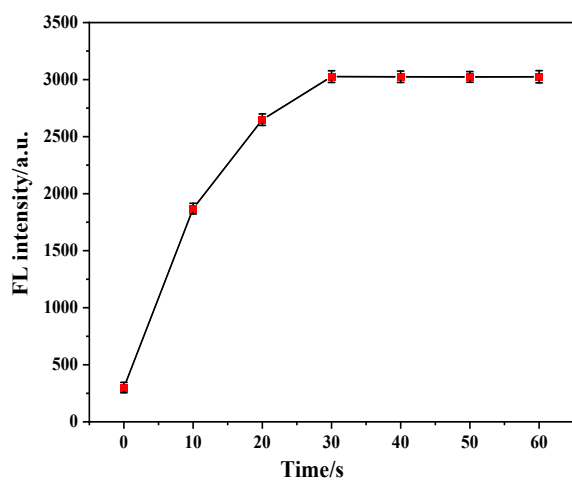

Fig. S6

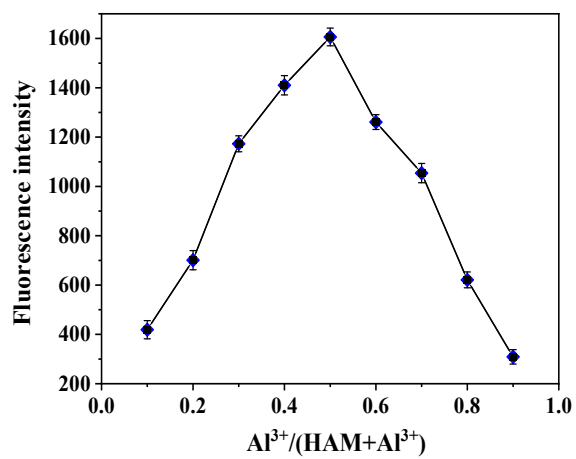

Fig. S7

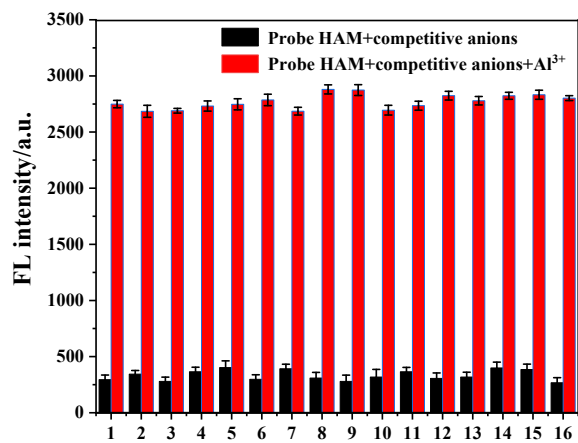

Fig. S8

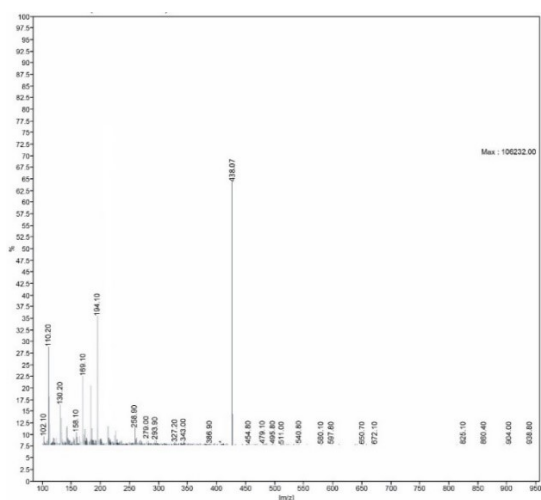

Fig. S9

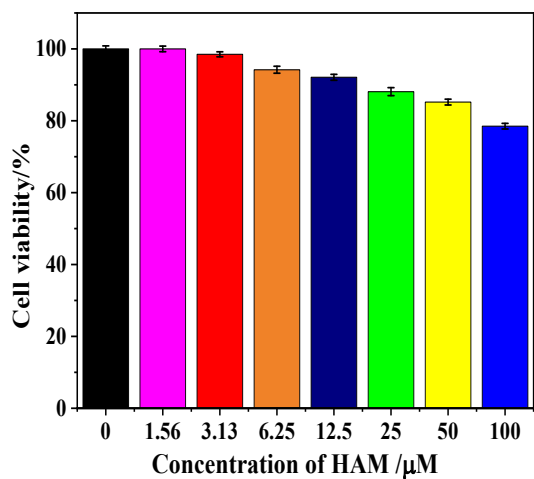

Fig. S10.

**Table S1.** Comparison of reported fluorescent probes for Al<sup>3+</sup> with **HAM**

| probe                                                                               | LOD      | Reference                         |
|-------------------------------------------------------------------------------------|----------|-----------------------------------|
| 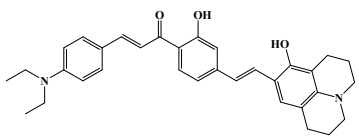   | 0.93 μM  | Spectrochim Acta A 2022<br>[26]   |
|    | 0.36 μM  | Spectrochim Acta A 2020<br>[27]   |
|    | 82.9 μM  | Inorg Chim Acta 2022<br>[28]      |
|    | 2.4 μM   | Sensor Actuat B-Chim 2015<br>[29] |
|   | 0.212 μM | Spectrochim Acta A 2020<br>[30]   |
|  | 1.48 μM  | J Photoch Photobio A 2020<br>[31] |
|  | 6.7 μM   | Sensor Actuat B-Chim 2017<br>[32] |
|  | 0.804 μM | Sensor Actuat B-Chim 2019<br>[33] |
|  | 0.5 μM   | J. Lumin 2019<br>[34]             |
| <b>This work</b>                                                                    | 0.168 μM |                                   |
